# Supplementary material for: Agro-morphological and metabolomics analysis of low nitrogen stress response in Axonopus compressus
Source: PubMed Central journal article supplement (PMC8256886; doi:10.1093/aobpla/plab022), 2021-05-07

### KEGG Classification

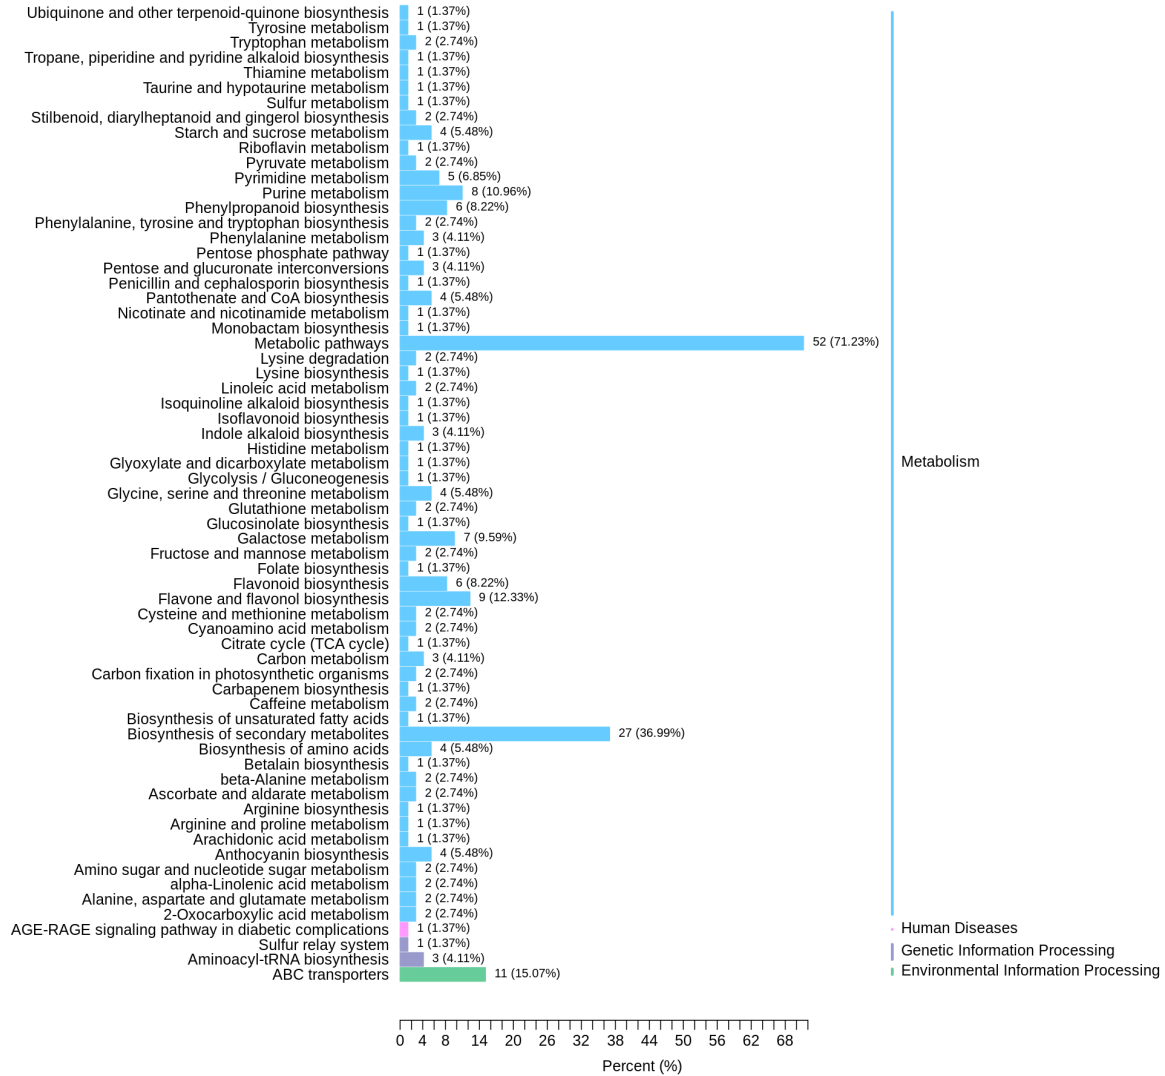

Supplement: plab022_suppl_supplementary_figure_s1.pdf [file plab022_suppl_supplementary_figure_s1.pdf]
